# Supplementary material for: Degradation of polycarbonate waste to recover bisphenol A and dimethyl carbonate using urea as a cheap green catalyst
Source: Royal Society of Chemistry journal article supplement (doi:10.1039/d4gc03205e), 2024-01-01
Supplement: d4gc03205e1.pdf [file d4gc03205e1.pdf]

Electronic Supplementary Material (ESI) for

# Degradation of polycarbonate waste to recover bisphenol A and dimethyl carbonate using urea as a green cheap catalyst

Nan Hu,<sup>a,b,c</sup> Lijuan Su,<sup>a,b,c</sup> Hongyan Li,<sup>a,b,c</sup> Ning Zhang,<sup>a,b,c</sup> Yongqin Qi,<sup>a,b,c</sup> Hongliang Wang,<sup>d</sup>

Xiaojing Cui,<sup>\*e</sup> Xianglin Hou,<sup>\*a,b,c</sup> and Tiansheng Deng,<sup>\*a,b,c</sup>

<sup>a</sup> *State Key Laboratory of Coal Conversion, Institute of Coal Chemistry, Chinese Academy of Sciences, 27 South Taoyuan Road, Taiyuan, 030001, People's Republic of China*

<sup>b</sup> *Center of Materials Science and Optoelectronics Engineering, University of Chinese Academy of Sciences, Beijing, 100049, People's Republic of China*

<sup>c</sup> *CAS Key Laboratory of Carbon Materials, Institute of Coal Chemistry, Chinese Academy of Sciences, 27 South Taoyuan Road, Taiyuan, 030001, People's Republic of China.*

<sup>d</sup> *Center of Biomass Engineering/College of Agronomy and Biotechnology, China Agricultural University, Beijing, 100193 China*

<sup>e</sup> *Institute of Interface Chemistry and Engineering, Department of Chemistry and Chemical Engineering, Taiyuan Institute of Technology, Taiyuan, Shanxi, 030008, People's Republic of China.*

*\*E-mail: dts117@sxicc.ac.cn; cxjtyut@126.com; houxianglin@sxicc.ac.cn*

## Green metrics analysis

Environmental impact factor (abbreviated as E-factor, EF), introduced by R. A. Sheldon, has been extensively used as a metric to quantify the sustainability of a process.<sup>1, 2</sup> A traditional E-factor is calculated by the total amount of waste generated including 10% of solvent losses but excluding water divided by the mass of product (eqn 1). Besides, for comparison, two new metrics simple E-factor (sE-factor, sEF) and complete E-factor (cE-factor, cEF) are also proposed. Based on the definition of E-factor, the sEF does not consider solvents and water (eqn 2), while the cEF sums all solvents (eqn 3). The amount of waste generated in recycling a certain amount of PC was calculated by the eqn 4. A lower E-factor means less waste production and is more positive to the environment. Process Mass Intensity (PMI) introduced by the EPA and ACS GCI, assesses efficiency by considering all materials as well as water used in a process (eqn 5).<sup>3</sup> A lower PMI means greater efficiency and economy. Here we provide details of the green metrics analysis for the recycling of PC in two modes: 1) a single degradation; 2) 10 cycles of degradation (Table S5 and S6).

$$EF = \frac{\sum m(\text{raw materials}) + \sum m(\text{catalysts}) + \sum m(\text{solvents}) * 10\% - m(\text{products})}{m(\text{products})} \quad (1)$$

$$cEF = \frac{\sum m(\text{raw materials}) + \sum m(\text{catalysts}) + \sum m(\text{solvents}) - m(\text{products})}{m(\text{products})} \quad (2)$$

$$sEF = \frac{\sum m(\text{raw materials}) + \sum m(\text{catalysts}) - m(\text{products})}{m(\text{products})} \quad (3)$$

$$\text{Waste amount} = \frac{EF * m(\text{products})}{m(\text{PC})} \quad (4)$$

$$PMI = cEF + 1 = \frac{\sum m(\text{input materials incl. process water})}{m(\text{products})} \quad (5)$$

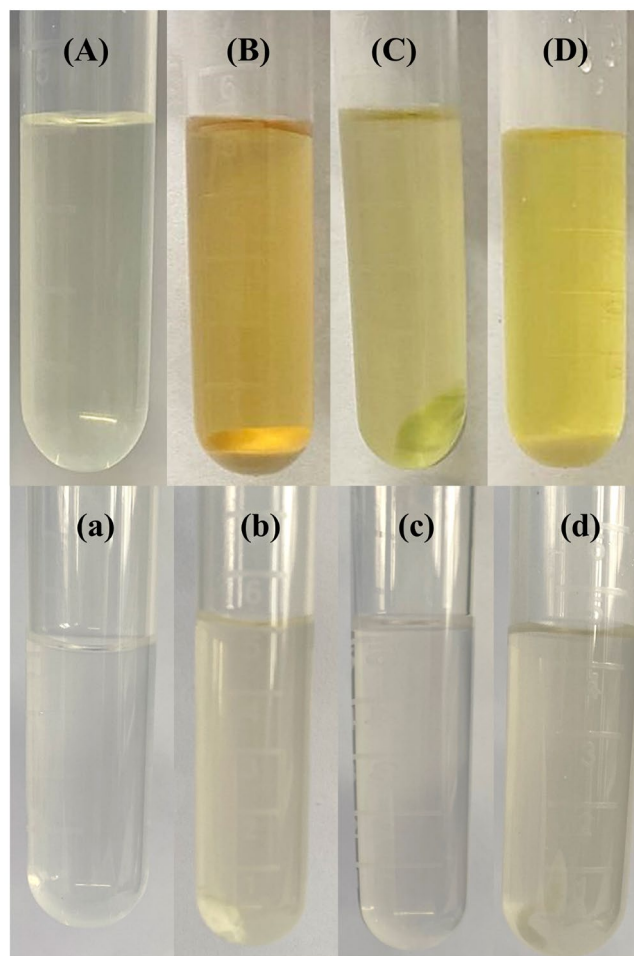

Fig. S1 PC degradation solutions catalyzed by NaOH (A–D) and urea (a–d). From A(a) to D(d), the depolymerizing reagents are H<sub>2</sub>O, MeOH, EtOH, and MeOH-50 wt.% H<sub>2</sub>O, respectively (0.2 g PC, 4 g depolymerizing reagent, 0.2 g catalyst, 140 °C, 3 h).

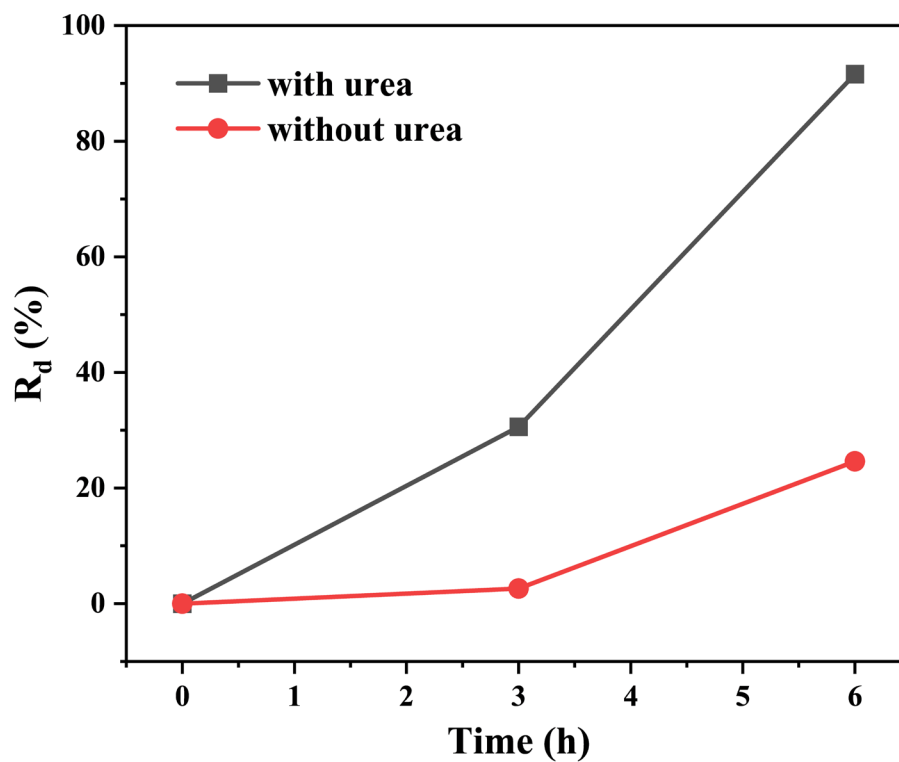

Fig. S2 PC methanolysis with or without urea.

Reaction condition: 0.2 g PC, 4 g methanol, with or without 0.02 g urea (42 mol% to PC), 140 °C.

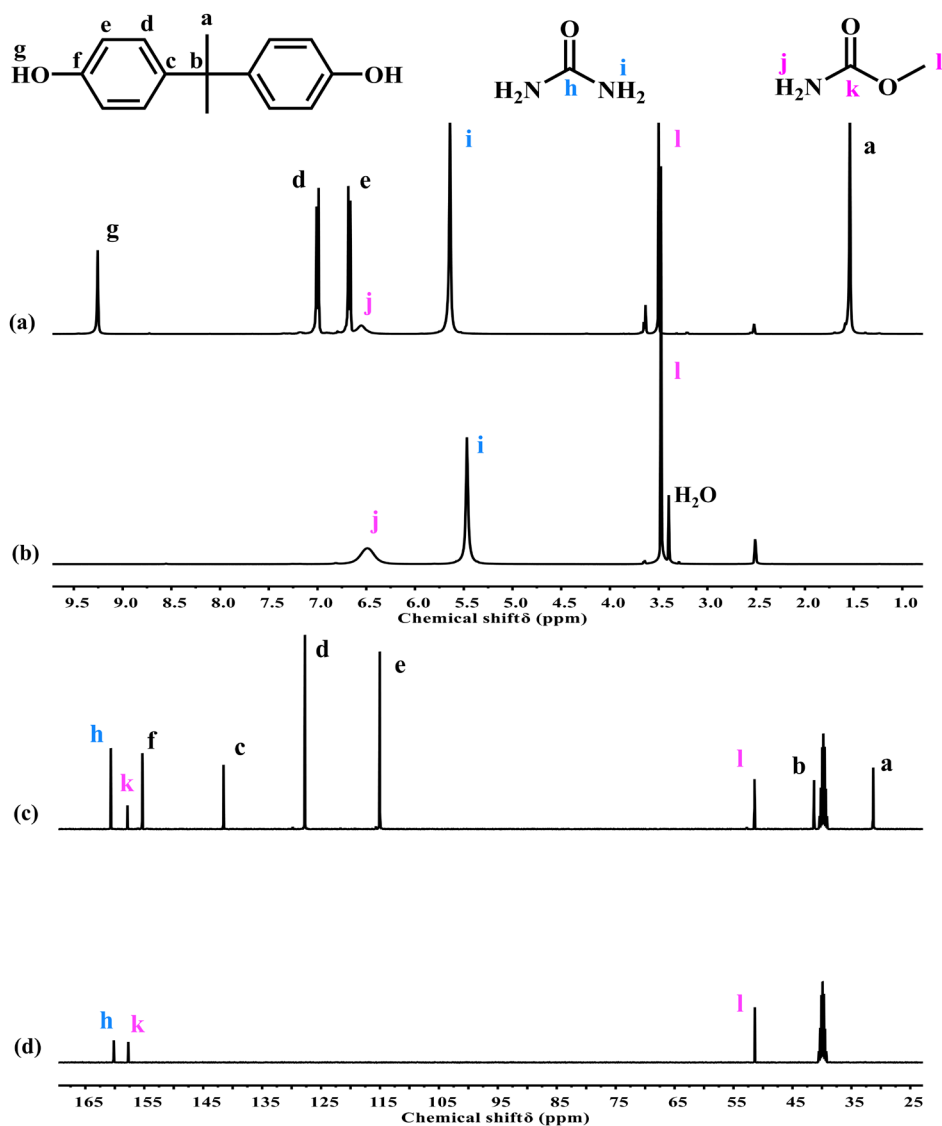

Fig. S3  $^1\text{H}$  NMR and  $^{13}\text{C}$  NMR spectra of the distillation residue of PC degradation solution (a and c) and the reaction solution of methanol and urea (b and d). Reaction conditions: (a and c) 0.2 g PC, 4 g methanol, 5 wt.% urea, 140 °C, 3 h. (b and d) 4 g methanol, 5 wt.% urea, 140 °C, 3 h.

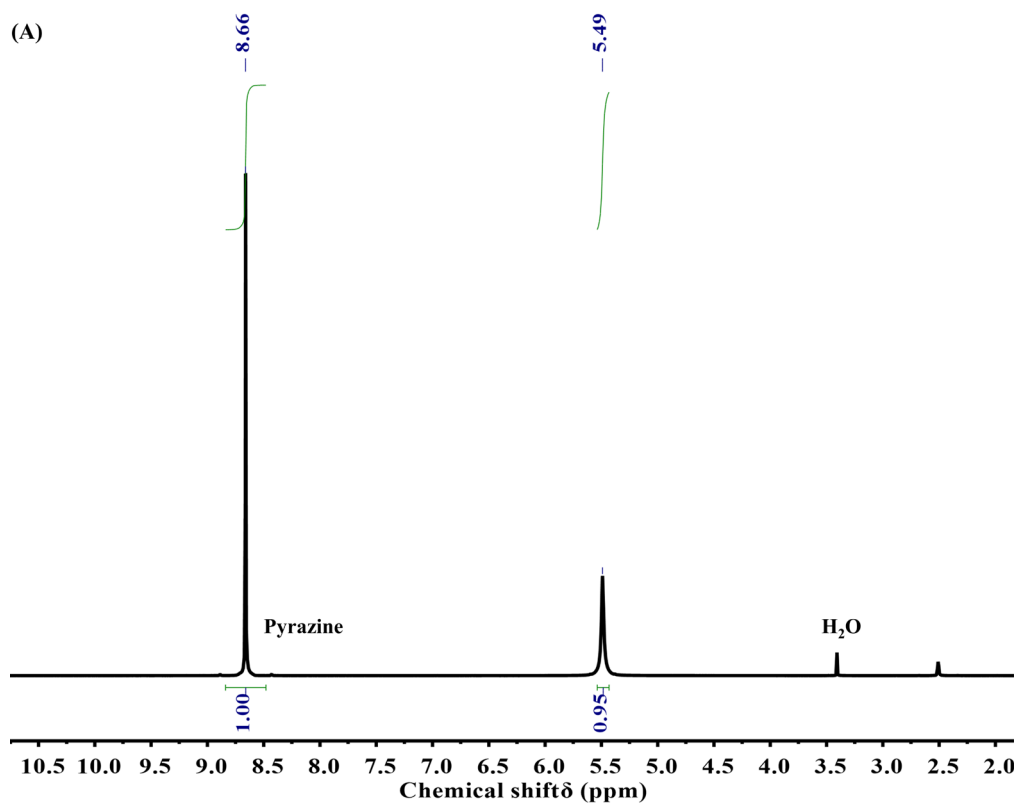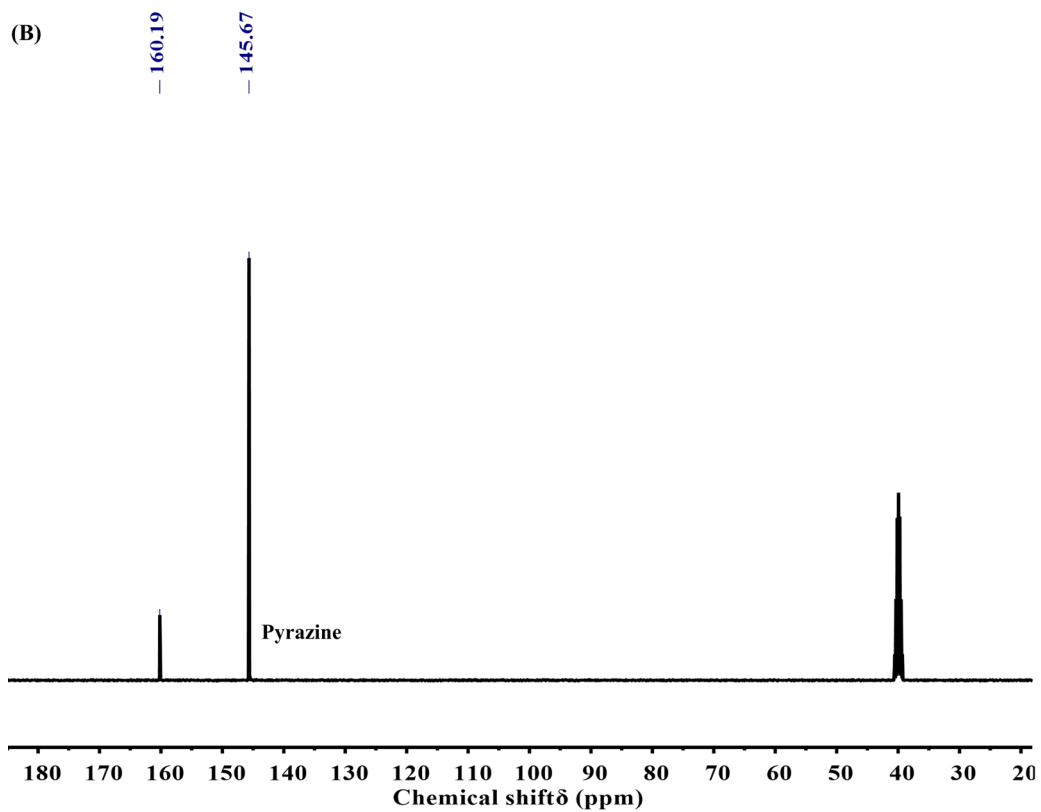

Fig. S4 <sup>1</sup>H NMR (A) and <sup>13</sup>C NMR (B) spectra of the isolated urea (Internal standard: pyrazine). Reaction condition: 0.2 g PC, 4 g methanol, 10 wt.% urea, 140 °C, 3 h.

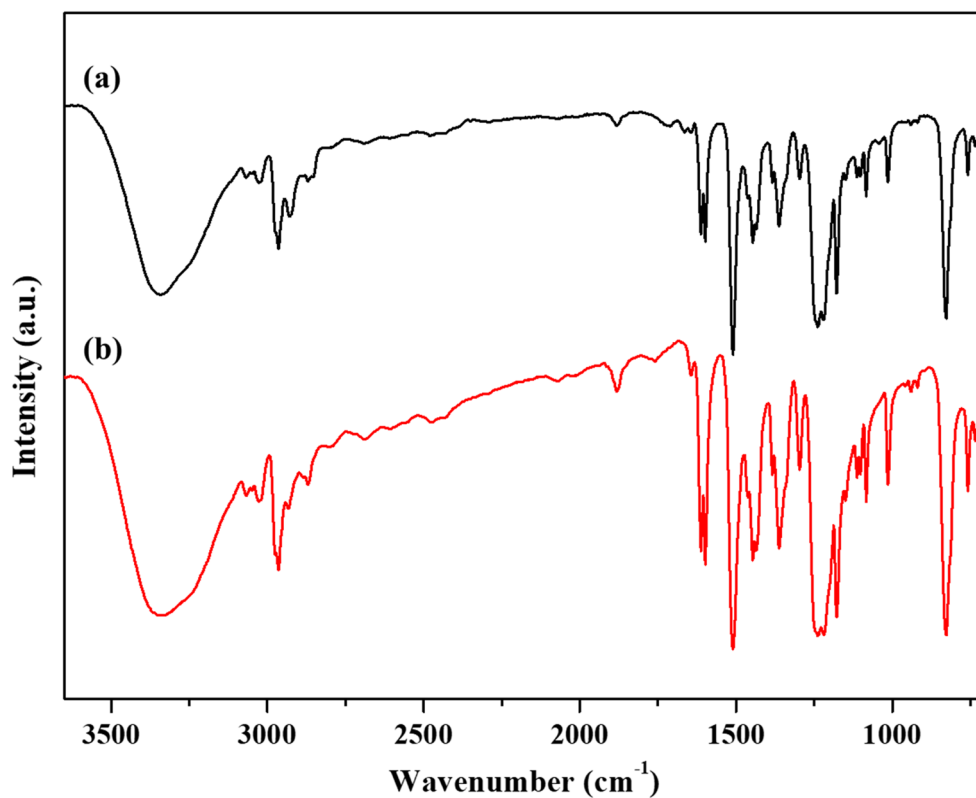

Fig. S5 IR spectra of (a) the degradation product BPA and (b) BPA standard. Reaction condition: 0.2 g PC, 4 g methanol, 10 wt.% urea, 140 °C, 3 h.

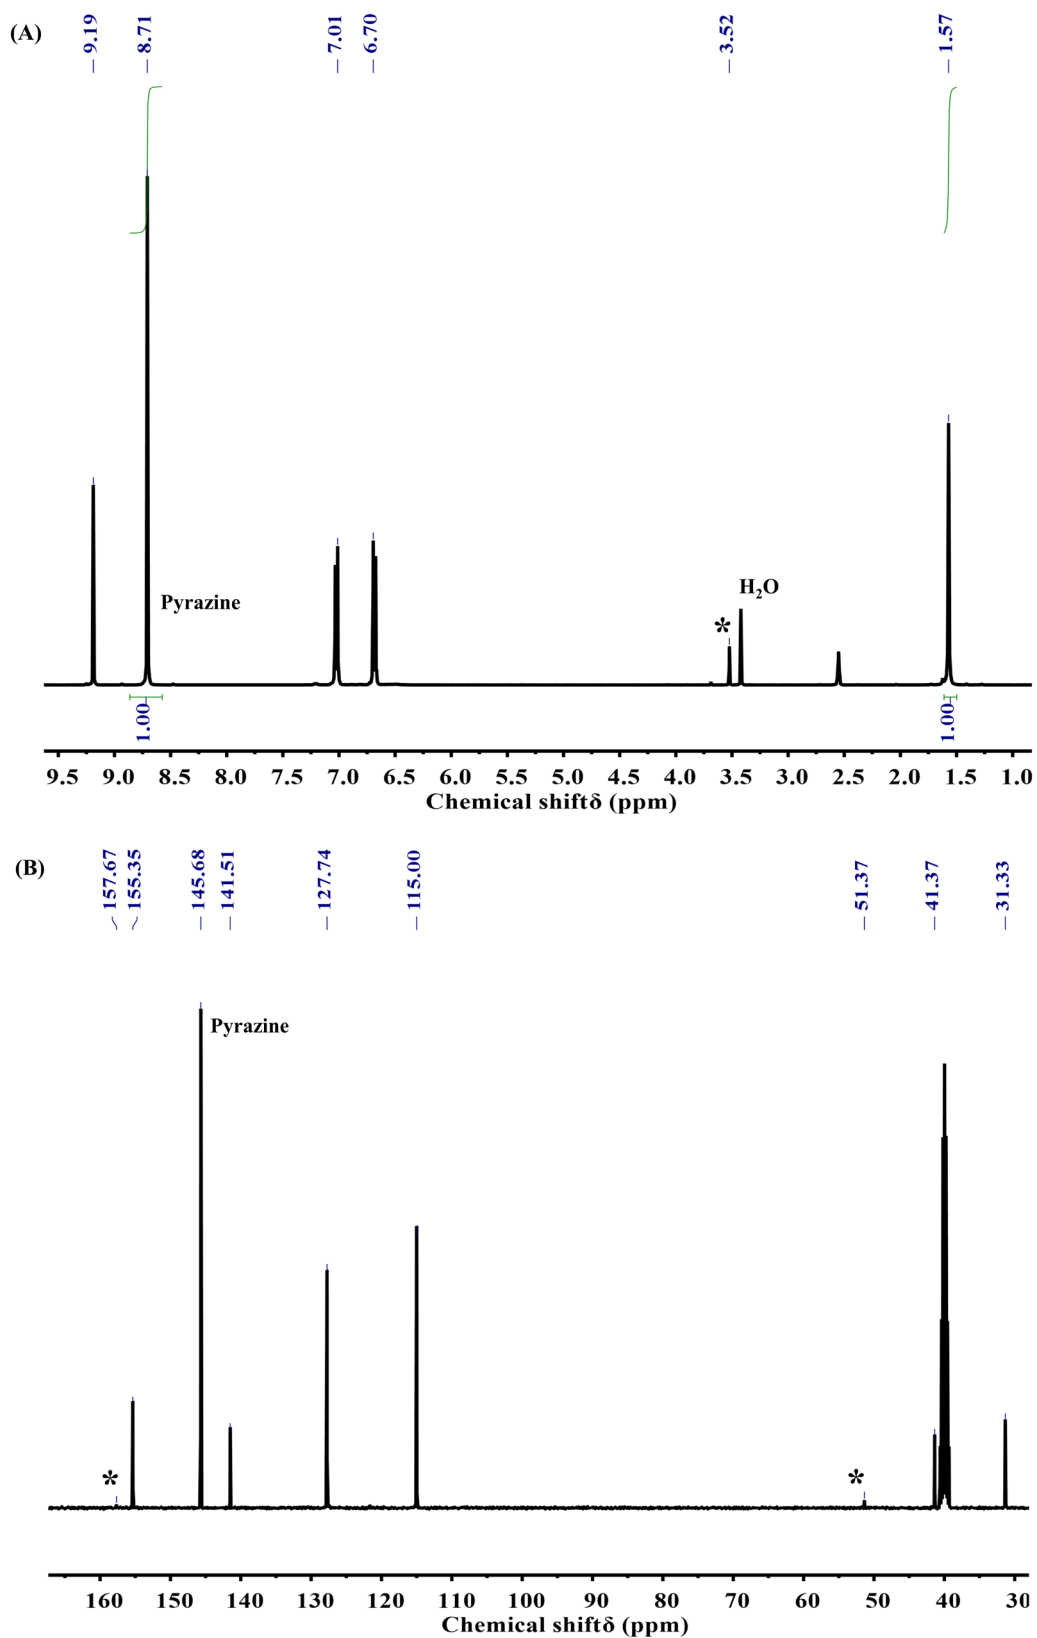

Fig. S6  $^1\text{H}$  NMR (A) and  $^{13}\text{C}$  NMR (B) spectra of the degradation product BPA (Internal standard: pyrazine; \* : methyl carbamate). Reaction condition: 0.2 g PC, 4 g methanol, 10 wt.% urea, 140  $^\circ\text{C}$ , 3 h.



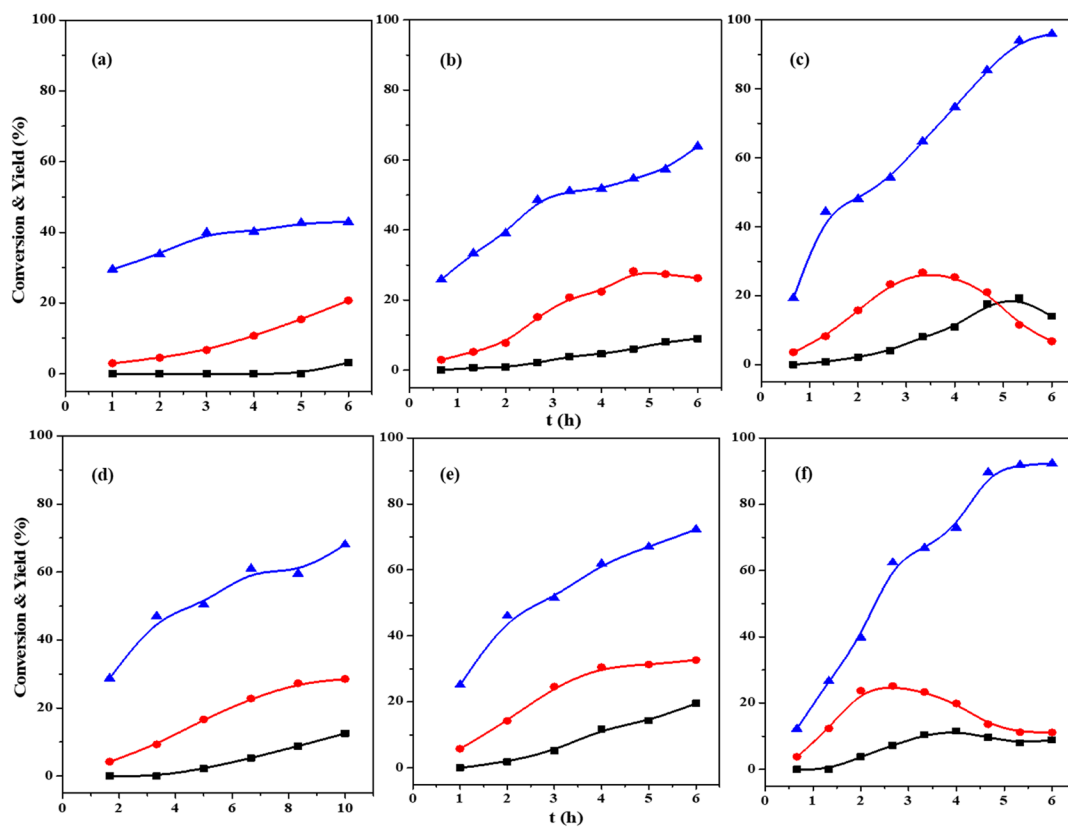

Fig. S7 DEC conversion ( $\blacktriangle$ ), EMC yield ( $\bullet$ ) and DMC yield ( $\blacksquare$ ) as a function of time at different temperatures at urea concentration of 10 wt.% (a, b and c at 140 °C, 160 °C, 180 °C, respectively) and 30 wt.% (d, e and f at 120 °C, 140 °C, 160 °C, respectively) (0.46 g DEC, 2.52 g MeOH (molar ratio is 1:20)).

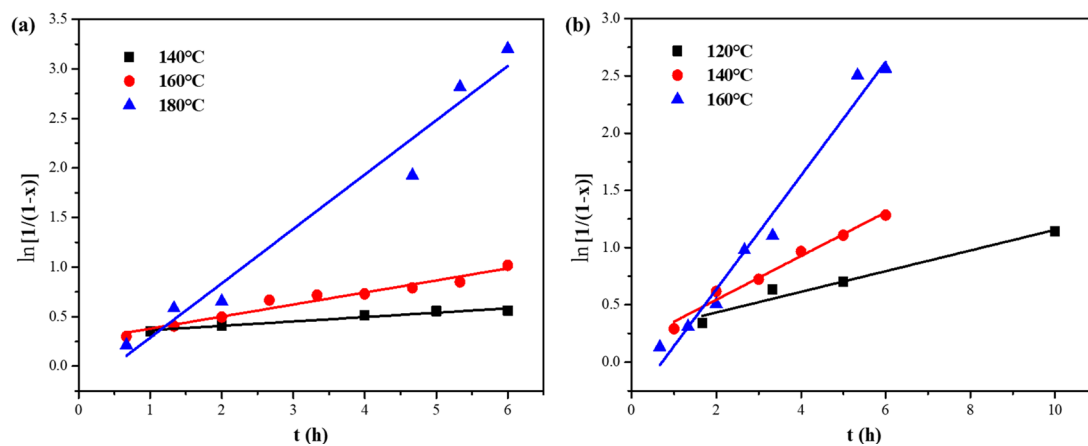

Fig. S8  $\ln[1/(1-x)]$  as a function of reaction time for the transesterification reaction between DEC and MeOH at different temperatures at urea concentration of (a) 10 wt.% and (b) 30 wt.% ( $x$  is the conversion of DEC).

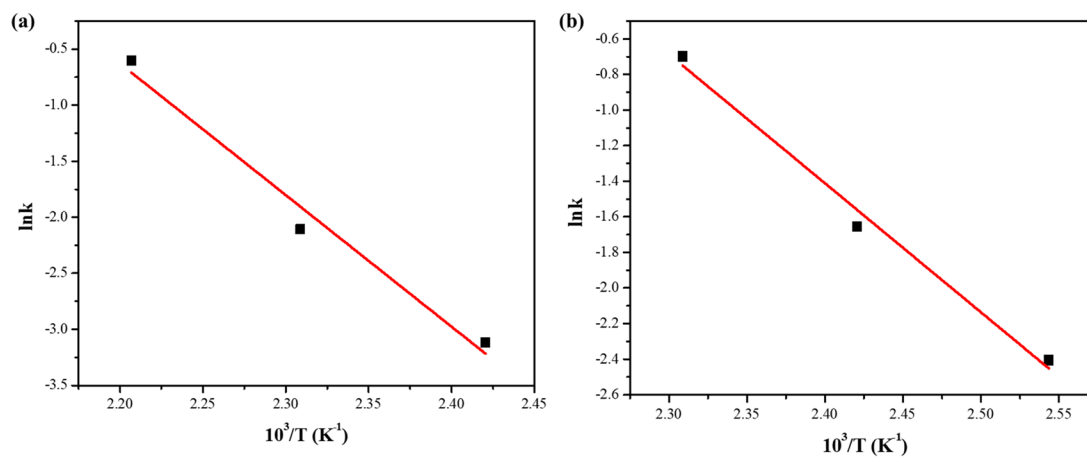

Fig. S9 Arrhenius plots for the transesterification reaction between DEC and MeOH at urea concentration of (a) 10 wt.% and (b) 30 wt.%.

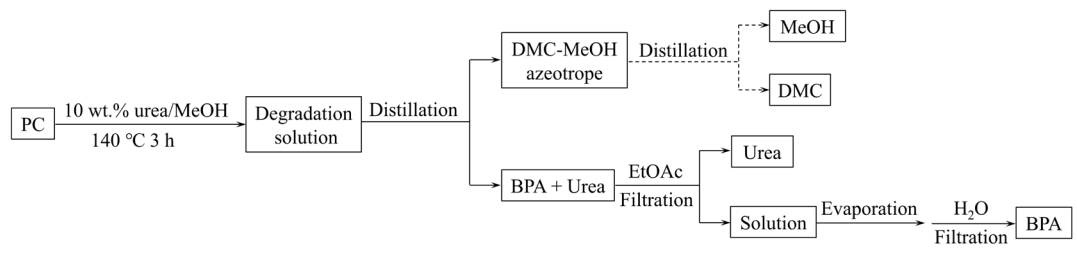

Scheme S1 The flow chart of the recycling of PC.

Table S1 The pressures of the urea/methanol solutions at different concentrations and temperatures<sup>a</sup>

| Urea concen./wt.% | Temp./°C |      |      |      |      |
|-------------------|----------|------|------|------|------|
|                   | 130      | 140  | 150  | 160  | 180  |
| 0                 | 0.69     | 0.93 | 1.25 | 1.60 | 2.54 |
| 5                 | 0.66     | 0.90 | 1.19 | 1.55 | 2.45 |
| 10                | 0.64     | 0.88 | 1.15 | 1.48 | 2.36 |
| 30                | 0.59     | 0.80 | 1.03 | 1.32 | 2.12 |

<sup>a</sup> Reaction condition: Teflon-lined stainless autoclave.

Table S2 PC methanolysis catalyzed by urea or MC<sup>a</sup>

| Entry | Catalyst | Time/h | Degraded or not |
|-------|----------|--------|-----------------|
| 1     | Urea     | 4      | Yes             |
| 2     | MC       | 18     | No              |

<sup>a</sup> PC: 0.2 g, MeOH: 4 g, catalyst:  $3.3 \times 10^{-3}$  mol, reaction temperature: 140 °C; MC: methyl carbamate.

Table S3 Element analysis results of BPA samples

| BPA sample       | C (%) | H (%) | O (%) | N (%) |
|------------------|-------|-------|-------|-------|
| Isolated product | 78.29 | 6.97  | 14.56 | 0.18  |
| Standard         | 78.89 | 6.95  | 14.12 | 0.04  |

Table S4 The reusability of the PC degradation system<sup>a</sup>

| Cycle | Degradation rate (%) | Cumulative yield (%) |
|-------|----------------------|----------------------|
| 0     | 100                  | —                    |
| 1     | 100                  | —                    |
| 2     | 100                  | —                    |
| 3     | 100                  | —                    |
| 4     | 100                  | —                    |
| 5     | 100                  | —                    |
| 6     | 100                  | —                    |
| 7     | 100                  | —                    |
| 8     | 100                  | —                    |
| 9     | 100                  | —                    |
| 10    | 100                  | BPA: 97.7, DMC: 33   |

<sup>a</sup> Reaction condition: 0.17 g PC, 3.38 g methanol, 0.34 g urea, 140 °C, 3 h. The degradation solution was reused directly by simply adding 0.17 g fresh PC at the end of each run.



Table S5 Material input-output table for the recycling of PC in two modes<sup>a</sup>

| Mode                                  | Input material | Input type   | Output material | Input weight/g      | Output weight/g | Yield/%           |
|---------------------------------------|----------------|--------------|-----------------|---------------------|-----------------|-------------------|
| a single degradation                  | PC             | Raw material |                 | 0.2075              |                 |                   |
|                                       | MeOH           | Solvent      |                 | 4.0078              |                 |                   |
|                                       | Urea           | Catalyst     |                 | 0.4021              |                 |                   |
|                                       |                |              | DMC             |                     | 0.0549          | 74.7              |
|                                       |                |              | BPA             |                     | 0.1740          | 93.4              |
| 10 cycles of degradation <sup>b</sup> | PC             | Raw material |                 | 1.8406 <sup>c</sup> |                 |                   |
|                                       | MeOH           | Solvent      |                 | 3.3872              |                 |                   |
|                                       | Urea           | Catalyst     |                 | 0.3432              |                 |                   |
|                                       |                |              | DMC             |                     | 0.2150          | 33 <sup>d</sup>   |
|                                       |                |              | BPA             |                     | 1.6144          | 97.7 <sup>d</sup> |

<sup>a</sup> m<sub>PC</sub>: m<sub>MeOH</sub>=1: 20, 10 wt.% urea, 140 °C 3 h. <sup>b</sup> The degradation solution was reused directly by simply adding 0.17 g fresh PC at the end of each run. <sup>c</sup> Total PC input. <sup>d</sup> Cumulative yield.

Table S6 Green metrics for the recycling of PC in two modes

| Mode                                  | sEF<br>(kg/kg) | cEF<br>(kg/kg) | EF<br>(kg/kg) | Waste amount<br>(kg/kg PC) | PMI<br>(kg/kg) |
|---------------------------------------|----------------|----------------|---------------|----------------------------|----------------|
| a single degradation                  | 1.66           | 19.17          | 3.41          | 3.76                       | 20.17          |
| 10 cycles of degradation <sup>a</sup> | 0.19           | 2.04           | 0.38          | 0.38                       | 3.04           |

<sup>a</sup> The degradation solution was reused directly for the next reaction.

Table S7 Comparison of representative catalytic systems for the methanolysis of PC

| Entry | Catalyst                             | Solvent  | Y <sub>BPA</sub> /% | Y <sub>DMC</sub> /% | Reusability | Ref.      | Notes                                                                                                        |
|-------|--------------------------------------|----------|---------------------|---------------------|-------------|-----------|--------------------------------------------------------------------------------------------------------------|
| 1     | [EmimOH]Cl-2Urea                     | —        | 98                  | —                   | 4           | 4         | The catalyst or solvent has certain toxicity;                                                                |
| 2     | [Ch] <sub>3</sub> [PO <sub>4</sub> ] | 2-Me-THF | 68                  | —                   | 5           | 5         | no recovering DMC                                                                                            |
| 3     | NaOH                                 | THF      | 96.7                | 91.2                | —           | 6         | Use toxic solvents                                                                                           |
| 4     | NBu <sub>4</sub> Cl/ZnO-NPs          | THF      | 98                  | 99                  | 5           | 7         |                                                                                                              |
| 5     | Zn(2)Et <sup>a</sup>                 | 2-Me-THF | 96                  | 86                  | —           | 8         |                                                                                                              |
| 6     | DBU                                  | —        | 99                  | 99                  | 7           | 9         | DBU is corrosive and irritating.                                                                             |
| 7     | [Bmim][Cl]                           | —        | 95.8                | 96.5                | 8           | 10        | The catalyst has certain toxicity; the preparation of ILs is cumbersome and costly.                          |
| 8     | Urea                                 | —        | 93.4                | 74.7                | 10          | This work | Urea is green, cheap, mass produced, and readily available; recover both BPA and DMC; no additional solvents |

<sup>a</sup> A Zn<sup>II</sup>-complex.

## References

1. R.A. Sheldon, *Green Chem.*, 2007, **9**, 1273-1283.
2. R.A. Sheldon, *Green Chem.*, 2017, **19**, 18-43.
3. F. Roschangar, R. A. Sheldon and C. H. Senanayake, *Green Chem.*, 2015, **17**, 752-768.
4. W. Huang, H. Wang, W. Hu, D. Yang, S. Yu, F. Liu and X. Song, *RSC Adv.*, 2021, **11**, 1595-1604.
5. F. D'Anna, M. Sbacchi, G. Infurna, N. T. Dintcheva and S. Marullo, *Green Chem.*, 2021, **23**, 9957-9967.
6. C. S. Bhogle and A. B. Pandit, *Ultrason. Sonochem.*, 2019, **58**, 104667.
7. F. Iannone, M. Casiello, A. Monopoli, P. Cotugno, M. C. Sportelli, R. A. Picca, N. Cioffi, M. M. Dell'Anna and A. Nacci, *J. Mol. Catal. A-Chem.*, 2017, **426**, 107-116.
8. J. M. Payne, M. Kamran, M. G. Davidson and M. D. Jones, *ChemSusChem*, 2022, **15**, e202200255.
9. E. Quaranta, D. Sgherza and G. Tartaro, *Green Chem.*, 2017, **19**, 5422-5434.
10. F. Liu, Z. Li, S. Yu, X. Cui and X. Ge, *J. Hazard. Mater.*, 2010, **174**, 872-875.
